## Correction for: Efficacy and safety of recombinant human follicle-stimulating hormone in patients undergoing *in vitro* fertilization-embryo transfer

Linli Hu<sup>1</sup>, Songying Zhang<sup>2</sup>, Song Quan<sup>3</sup>, Jieqiang Lv<sup>4</sup>, Weiping Qian<sup>5</sup>, Yuanhua Huang<sup>6</sup>, Weiyong Lu<sup>6</sup>, Yingpu Sun<sup>1</sup>

<sup>1</sup>The First Affiliated Hospital of Zhengzhou University, Reproductive Medicine, Zhengzhou, China

<sup>2</sup>Sir Run Run Shaw Hospital of Zhejiang University, Reproductive Medicine, Hangzhou, China

<sup>3</sup>Southern Medical University, Reproductive Medicine, Guangzhou, China

<sup>4</sup>Second Affiliated Hospital of Wenzhou Medical University, Reproductive Medicine, Wenzhou, China

<sup>5</sup>Peking University Shenzhen Hospital, Reproductive Medicine, Shenzhen, China

<sup>6</sup>Hainan Medical College, Reproductive Medicine, Haikou, China

**Correspondence to:** Yingpu Sun; email: [syp2008@vip.sina.com](mailto:syp2008@vip.sina.com)

**Keywords:** recombinant human FSH (r-hFSH), ovarian stimulation, assisted reproductive technology (ART), oocytes retrieved, IVF-ET

**Original article:** *Aging (Albany NY)* 2020; 12: pp 4918-4930

PMID: [32209728](https://pubmed.ncbi.nlm.nih.gov/32209728/)

PMCID: [PMC7138541](https://pubmed.ncbi.nlm.nih.gov/PMC7138541/)

doi: [10.18632/aging.102919](https://doi.org/10.18632/aging.102919)

**This article has been corrected:** The authors found several small errors and miscalculations, which were corrected making text consistent with the Supplemental Clinical Study Final Report:

### **Table 1. Baseline characteristics (MFAS population).**

**7<sup>th</sup> row:** The unit “month” for the “Duration of infertility” was corrected to “year”, making it consistent with the Supplemental Clinical Study Final Report.

**13<sup>th</sup> row:** The *p*-value (0.242) for “Fertilization procedure, n (%)” was corrected to “0.212”. In addition, a footnote “b” (The total number of evaluable patients was 110 in the Gonal-F® Pen group)” was added.

### **RESULTS, Patients**

The *p*-value in the last sentence in the **Patients** section was changed from *p* = 0.242 to *p* = 0.212.

**Corrected sentence:** “The distribution of the patients according to fertilization procedure was similar between the groups (*p* = 0.212).” This is now consistent with value in the corrected **Table 1**.

### **RESULTS, Efficacy – Primary outcome**

In the first sentence of the “Primary outcome” section, the abbreviation “±SD” was corrected to “±SE”, and the number 13 was corrected to 13.5. This SE value was estimated from an ad hoc analysis for this manuscript; the analysis source (SAS output) is available. The number 13.5 was based on a result from the Clinical Study Final Report (Table 15, available).

**Corrected sentence:** “The least square mean (±SE) number of oocytes retrieved was 14.9 (± 0.5; median [range]: 14 [1 to 41]) in the Follitrope group and 12.8 (± 0.9; median [range]: 13.5 [3 to 33]) in the Gonal-F group, showing a treatment difference of 2.1 oocytes.”

## RESULTS, Efficacy – Secondary outcome

A subtraction error was corrected in the following sentence, which changed 44.3% to 44.6%.

**Corrected sentence:** “In the Follitrope group, 186 patients (55.4%) underwent ET in contrast to 79 patients (71.8%) in the Gonal-F group; thus, the cancellation rate was 44.6% and 28.2% in the Follitrope and Gonal-F groups, respectively ( $p = 0.0028$ ).”

A numerical error was also corrected in the following sentence, which changed 35.3% to 35.5%.

**Corrected sentence:** “The percentage of embryos that were successfully implanted in patients showing gestational sacs (i.e., implantation rate) was 39.8% in the Follitrope group and 35.5% in the Gonal-F group ( $p = 0.376$ ).” This correction makes the stated numbers consistent with **Table 2**.

### Table 2. Efficacy outcomes (PP population).

**3rd and 4th rows:** For “No. of follicles with diameter of  $\geq 14$  mm on hGC day” and “E2 concentration on hGC day, pg/mL), a footnote “a” was added based on the final result from the Clinical Study Final Report (Tables 26 and 36).

**5th row:** For “No. of oocytes retrieved” the footnote “c” (Values are mean $\pm$ SE)” was added, as requested above for the “Primary outcome” section in the RESULTS. In addition, the  $p$ -value was corrected from “0.022” to “0.057” based on the final result from the Clinical Study Final Report (Table 16).

Corrected **Tables 1** and **2** are presented below.

**Table 1. Baseline characteristics (MFAS population).**

|                                                | Follitrope™ PFS<br>(N = 336) | Gonal-F® Pen<br>(N = 111) | <i>p</i> -value |
|------------------------------------------------|------------------------------|---------------------------|-----------------|
| Age, years <sup>a</sup>                        | 29.4 $\pm$ 3.9               | 29.3 $\pm$ 3.6            | 0.814           |
| Age, n (%)                                     |                              |                           | 0.376           |
| 20-30 yrs                                      | 198 (59)                     | 73 (66)                   |                 |
| 31-35 yrs                                      | 118 (35)                     | 31 (28)                   |                 |
| 36-39 yrs                                      | 20 (6)                       | 7 (6)                     |                 |
| BMI, kg/m <sup>2a</sup>                        | 21.4 $\pm$ 2.7               | 21.3 $\pm$ 2.6            | 0.881           |
| Duration of infertility, year <sup>a</sup>     | 3.9 $\pm$ 2.5                | 3.9 $\pm$ 3.1             | 0.805           |
| Main reason for infertility, n (%)             |                              |                           | 0.250           |
| Tubal factor                                   | 149 (44.3)                   | 42 (37.8)                 |                 |
| Male factor                                    | 105 (31.3)                   | 46 (41.4)                 |                 |
| Unexplained                                    | 58 (17.3)                    | 15 (13.5)                 |                 |
| Combined                                       | 24 (7.1)                     | 8 (7.2)                   |                 |
| Fertilization procedure, n (%) <sup>b</sup>    |                              |                           | 0.212           |
| IVF                                            | 182 (54.2)                   | 50 (45.5)                 |                 |
| ICSI                                           | 130 (38.7)                   | 53 (48.2)                 |                 |
| IVF and ICSI                                   | 24 (7.1)                     | 7 (6.4)                   |                 |
| Basal FSH level, mIU/ml <sup>a</sup>           | 3.0 $\pm$ 0.9                | 3.1 $\pm$ 1.0             | 0.827           |
| Basal E <sub>2</sub> level, pg/mL <sup>a</sup> | 21.4 $\pm$ 12.4              | 20.4 $\pm$ 10.6           | 0.498           |

<sup>a</sup> Values are mean $\pm$ SD

<sup>b</sup> Total number of evaluable patients were 110 for Gonal-F® Pen group.

**Table 2. Efficacy outcomes (PP population).**

|                                                                  | <b>Follitrope™ PFS<br/>(N = 336)</b> | <b>Gonal-F® Pen<br/>(N = 110)</b> | <b>p-value</b> |
|------------------------------------------------------------------|--------------------------------------|-----------------------------------|----------------|
| Total injected dose of r-FSH, IU <sup>a</sup>                    | 1945.3 ± 635.7                       | 2020.2 ± 562.7                    | 0.271          |
| Duration of treatment, days <sup>a</sup>                         | 10.7 ± 1.6                           | 11.1 ± 1.4                        | 0.027          |
| No. of follicles with diameter of ≥14 mm on hCG day <sup>a</sup> | 10.2 ± 4.0                           | 10.1 ± 4.4                        | 0.750          |
| E <sub>2</sub> concentration on hCG day, pg/mL <sup>a</sup>      | 4460.0 ± 2564.1                      | 4051.9 ± 2583.5                   | 0.167          |
| No. of oocytes retrieved <sup>c</sup>                            | 14.9 ± 0.5                           | 12.8 ± 0.9                        | 0.057          |
| No. of Metaphase II oocytes, n (%) <sup>a,b</sup>                | 85.3 ± 14.0                          | 85.0 ± 15.8                       | 0.895          |
| Fertilization rate (%)                                           | 70.6                                 | 74.6                              | 0.079          |
| No. of embryos transferred <sup>a</sup>                          | 2.0 ± 0.3                            | 2.0 ± 0.4                         | 0.731          |
| Embryo implantation rate (%)                                     | 39.8 (144/362)                       | 35.5 (55/155)                     | 0.376          |
| Biochemical pregnancy rate (%)                                   | 4.3 (8/186)                          | 10.1 (8/79)                       | 0.110          |
| Clinical pregnancy rate (%)                                      | 55.4 (103/186)                       | 51.9 (41/79)                      | 0.168          |
| Ongoing pregnancy rate (%)                                       | 44.1 (82/186)                        | 43.0 (34/79)                      | 0.758          |

<sup>a</sup> Values are mean±SD

<sup>b</sup> ICSI patients only

<sup>c</sup> Values are mean±SE
